# Supplementary material
Source: Springer Nature journal article supplement (https://www.springermedizin.de/resource/supplementary/12889_2008_1996_MOESM1_ESM.pdf/9487230)

**\*\*p=0.67**

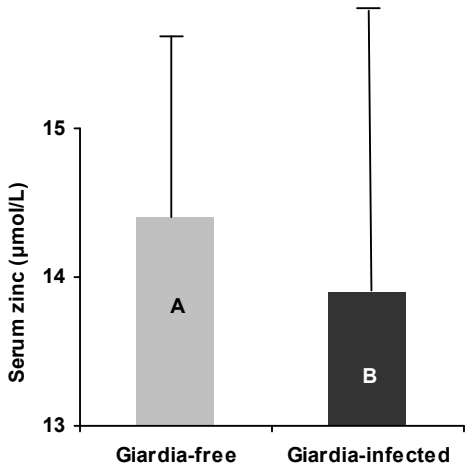

Supplement: MOESM1 [file 9487230]
